# Supplementary material
Source: PubMed Central journal article supplement (PMC3523737)
Supplement: NIHMS348221-supplement-Supplemental_Material.pdf [file NIHMS348221-supplement-Supplemental_Material.pdf]

### Supplementary Table I

#### Patient Characteristics

| Characteristics          | Aortic Stenosis<br>(N=3) | Controls<br>(N=4) | Significance (p-value) |
|--------------------------|--------------------------|-------------------|------------------------|
| Age (years)              | 78.7 ± 14.8              | 48 ± 16           | 0.046                  |
| Male                     | 2 (66.7%)                | 1 (25.0%)         | 0.35                   |
| Smokers                  | 1 (33.3%)                | 0 (0.0%)          | 0.38                   |
| Hypertension             | 2 (66.7%)                | 1 (25.0%)         | 0.52                   |
| Diabetes Mellitus        | 0 (0.0%)                 | 0 (0.0%)          | N/A                    |
| CVA                      | 0 (0.0%)                 | 1 (25.0%)         | 0.38                   |
| PVD                      | 0 (0.0%)                 | 1 (25.0%)         | 0.38                   |
| Coronary Artery Disease  | 3 (100.0%)               | 0 (0.0%)          | 0.45                   |
| Hyperlipidemia           | 0 (0.0%)                 | 1 (33.3 %)        | 0.38                   |
| CAVD                     | 3 (100.0%)               | 0 (0.0%)          | <0.0001                |
| Adjusted Calcium (mg/dL) | 9.17 ± 0.58              | 8.7 ± 1.3         | 0.64                   |

**Supplement Table II**

|                          | <b>VIC / SMC</b>                                                                                                                                                                                                                                                                                                                              | <b>VEC / HUVEC</b>                                                                                   |
|--------------------------|-----------------------------------------------------------------------------------------------------------------------------------------------------------------------------------------------------------------------------------------------------------------------------------------------------------------------------------------------|------------------------------------------------------------------------------------------------------|
| <b>Morphology</b>        | <p>Resemble fibroblasts in morphology, being elongated and forming an orthogonal pattern of overgrowth postconfluence. Long cytoplasmic extensions, prominent adhesion and gap junctions, an incomplete basal lamina, and close association with the extra-cellular matrix (Filip, Radu et al. 1986; Diane L Mulholland and Gotlieb 1997)</p> | <p>Cobblestone-like shape with an oval centrally located nucleus (Manduteanu, Popov et al. 1988)</p> |
| <b>Markers expressed</b> | <p>FSA (Latif, Sarathchandra et al. 2007)</p>                                                                                                                                                                                                                                                                                                 | <p>CD31 (Newman, Berndt et al. 1990; Paranya, Vineberg et al. 2001)</p>                              |
|                          | <p><math>\alpha</math>-SMA (Taylor, Batten et al. 2003; Liu, Joag et al. 2007)</p>                                                                                                                                                                                                                                                            | <p>CD34 (Chalajour, Treede et al. 2007)</p>                                                          |
|                          | <p>SM myosin (Latif, Sarathchandra et al. 2007)</p>                                                                                                                                                                                                                                                                                           | <p>vWF (Manduteanu, Popov et al. 1988)</p>                                                           |
|                          | <p>Vimentin (Liu, Joag et al. 2007)</p>                                                                                                                                                                                                                                                                                                       | <p>CD105 (Chalajour, Treede et al. 2007)</p>                                                         |

Alizarin Red 10X

HE 10X

CD31

NCAV

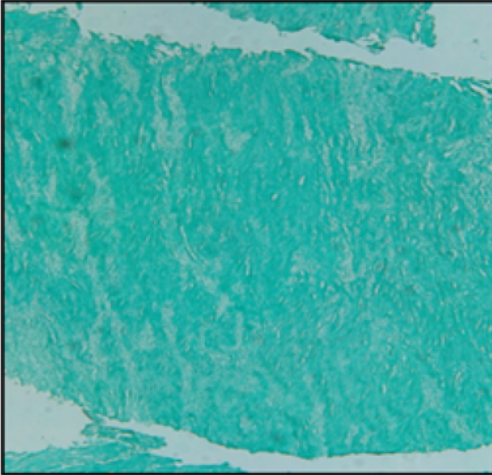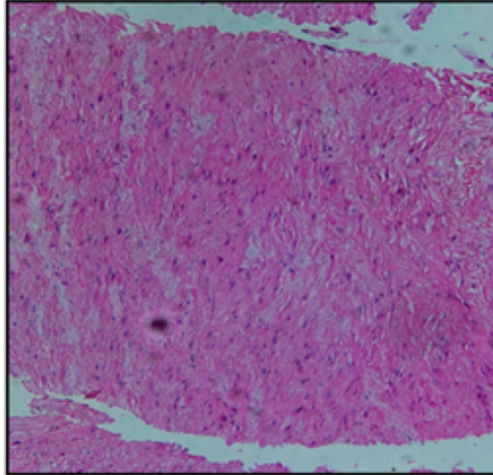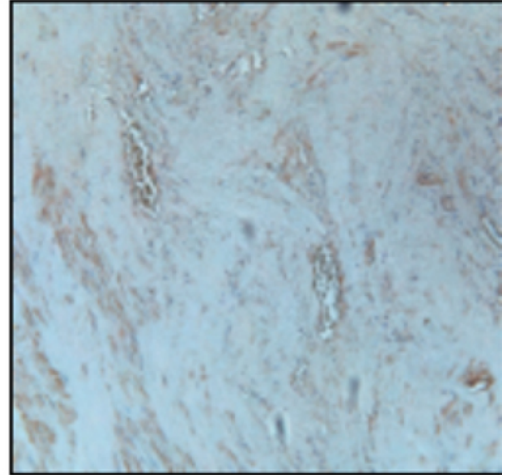

CAV

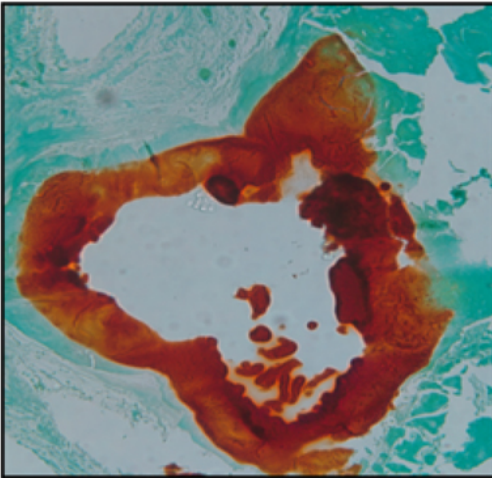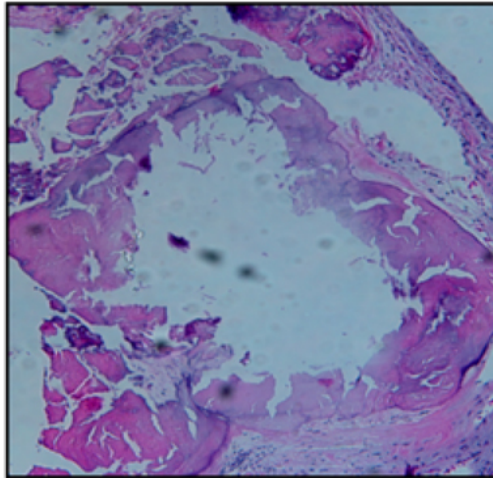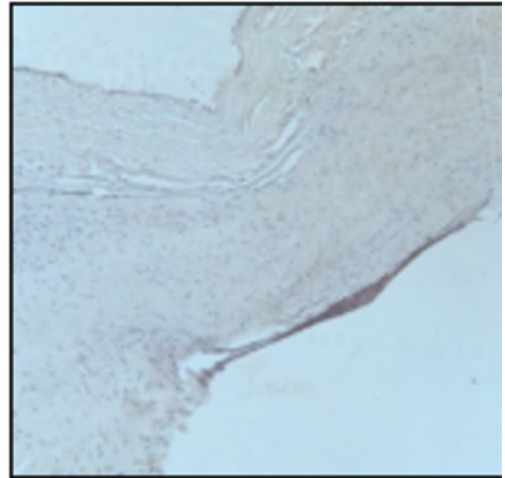

**Supplementary Figure I**

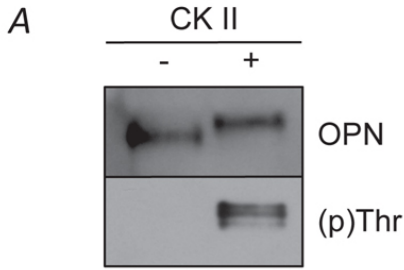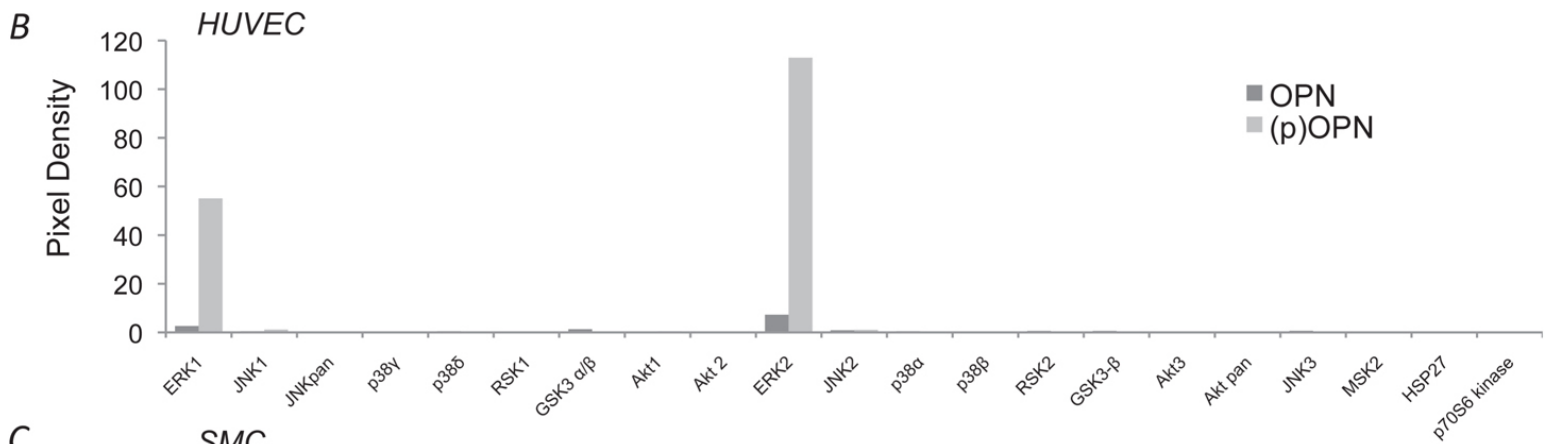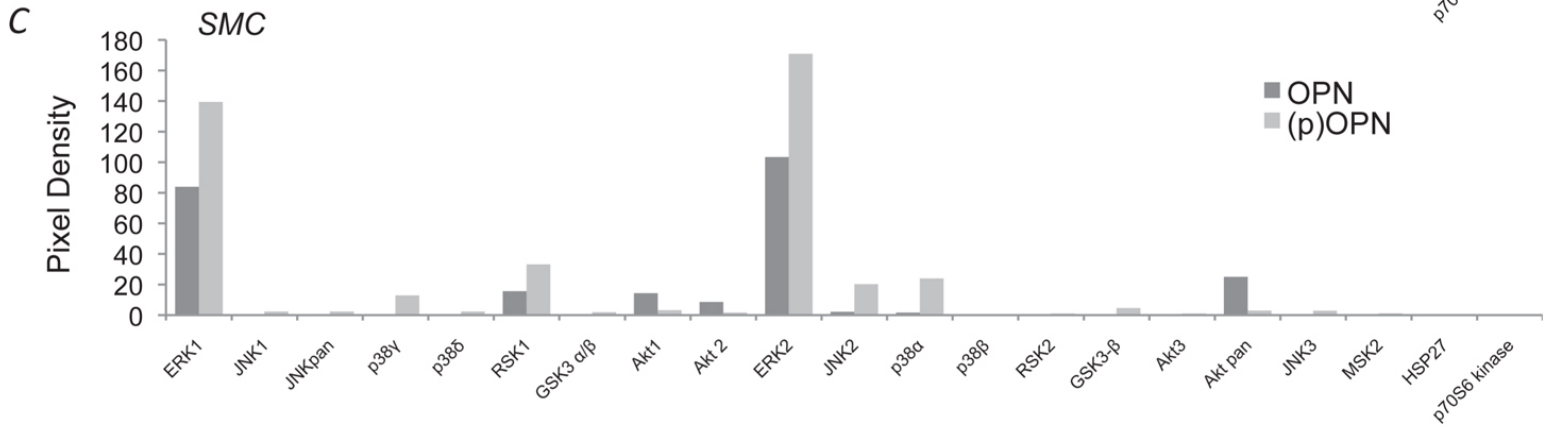

**Supplementary Figure II**

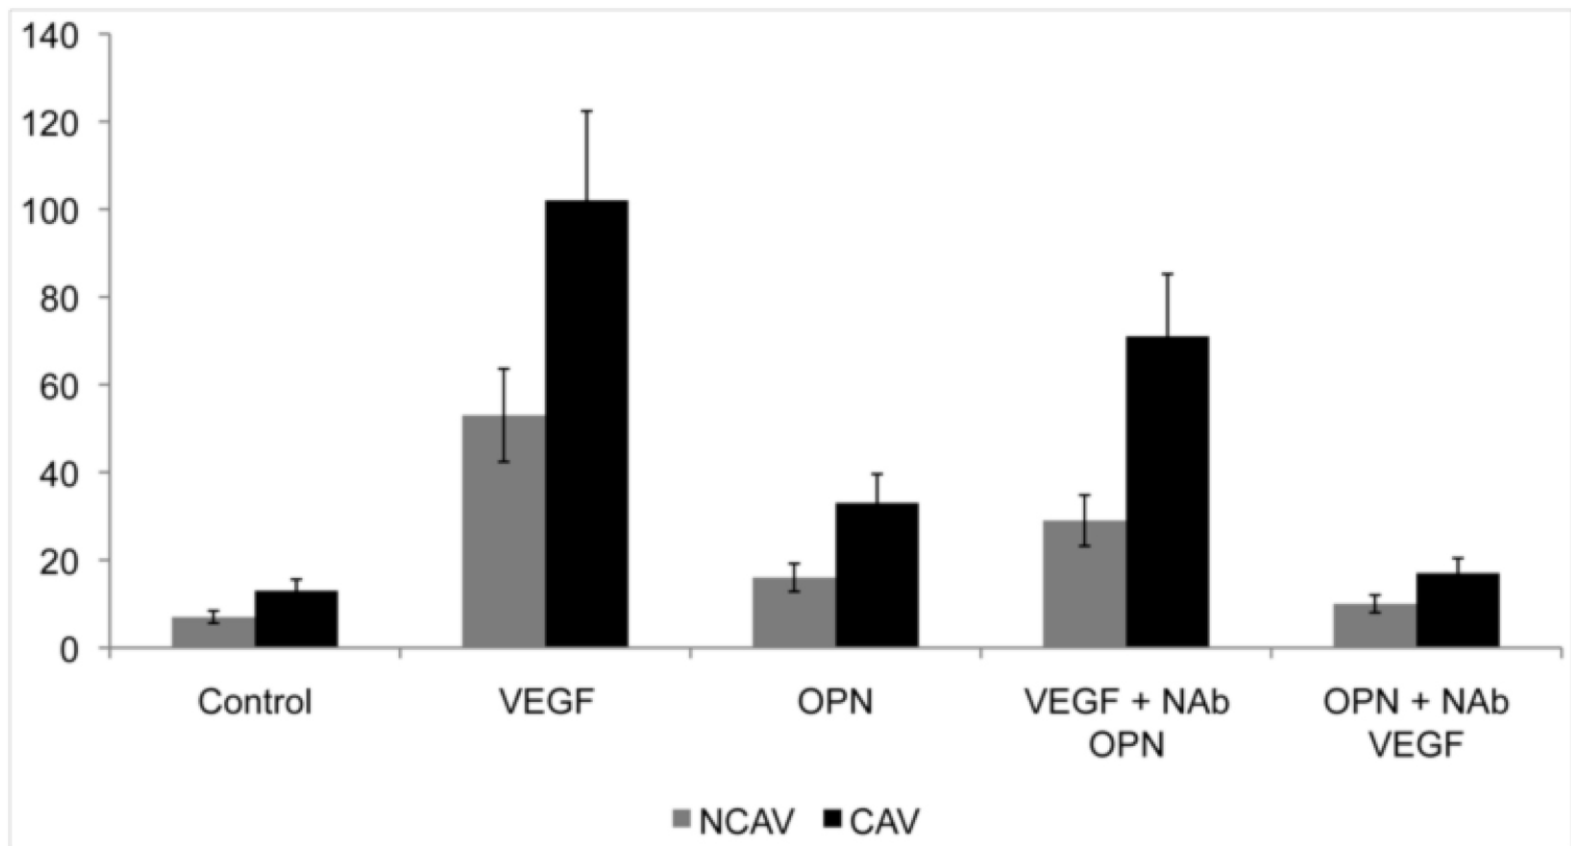

Supplementary Figure III
